# Supplementary material for: Non-covalent switch for intramolecular energy transferElectronic supplementary information (ESI) available: fluorescence spectra and excitation spectra. See http://www.rsc.org/suppdata/cc/b2/b212912d/
Source: Royal Society of Chemistry journal article supplement (doi:10.1039/b212912d), 2003-02-05
Supplement: b212912d.doc [file b212912d.doc]

**Electronic supplementary information**

**Non-covalent switch for intramolecular energy transfer**

Joe Otsuki,* Akane Yasuda and Toshio Takido

College of Science and Technology, Nihon University, Kanda Surugadai, Chiyoda-ku, Tokyo 101-8308 Japan. Fax: 81 3 3259 0817; Tel: 81 3 3259 0817; E-mail: otsuki@chem.cst.nihon-u.ac.jp

**Fig. S1** Fluorescence spectra of ZnFbU, ZnTPP and TMP in CH2Cl2 at 25 ˚C; **ex = 555 nm. Intensities are corrected with respect to absorbance.

**Fig. S2** Excitation spectra monitored at 712 nm in CH2Cl2 at 25 ˚C for ZnFbU (10 M), DMAP (0.6 mM) + ZnFbU (10 M), PhNNPy (1 mM) + ZnFbU (10 M) and TMP (dotted line). The spectrum of TMP is normalised at 645 nm with that of PhNNPy•ZnFbU.

**Fig. S3** Fluorescence spectra of a solution of ZnFbU (10 M), PhNNPy (1 mM) and DMAP (0—0.8 mM) in CH2Cl2 at 25 ˚C; **ex = 566 nm. Inset: intensity changes at 650 nm.
